# Supplementary material
Source: PubMed Central journal article supplement (PMC4522163)

**Supplementary Appendix 1.** Diagnostic codes used to define study measures.

| <b>Table S1. Diagnostic codes used to define outcome measurements.</b> |                                    |
|------------------------------------------------------------------------|------------------------------------|
| <b>Outcome measurement</b>                                             | <b>Diagnostic code<sup>a</sup></b> |
| Gout                                                                   | 274                                |
| Acute kidney failure                                                   | 584                                |
| Chronic kidney disease                                                 | 585                                |
| Renal failure, unspecified                                             | 586                                |
| Nephrolithiasis                                                        | 592                                |
| Other renal disorders                                                  | 593                                |

<sup>a</sup> Diagnostic code based on the International Classification of Disease, Ninth Revision, Clinical Modification (ICD-9-CM).

**Supplementary Appendix 2.** Study design for data integration and ascertainment of the primary outcome of time to first diagnostic billing claim for gout or pharmacy fill record for a medication typically used to treat gout among living kidney donors and age- and sex-matched non-donors.

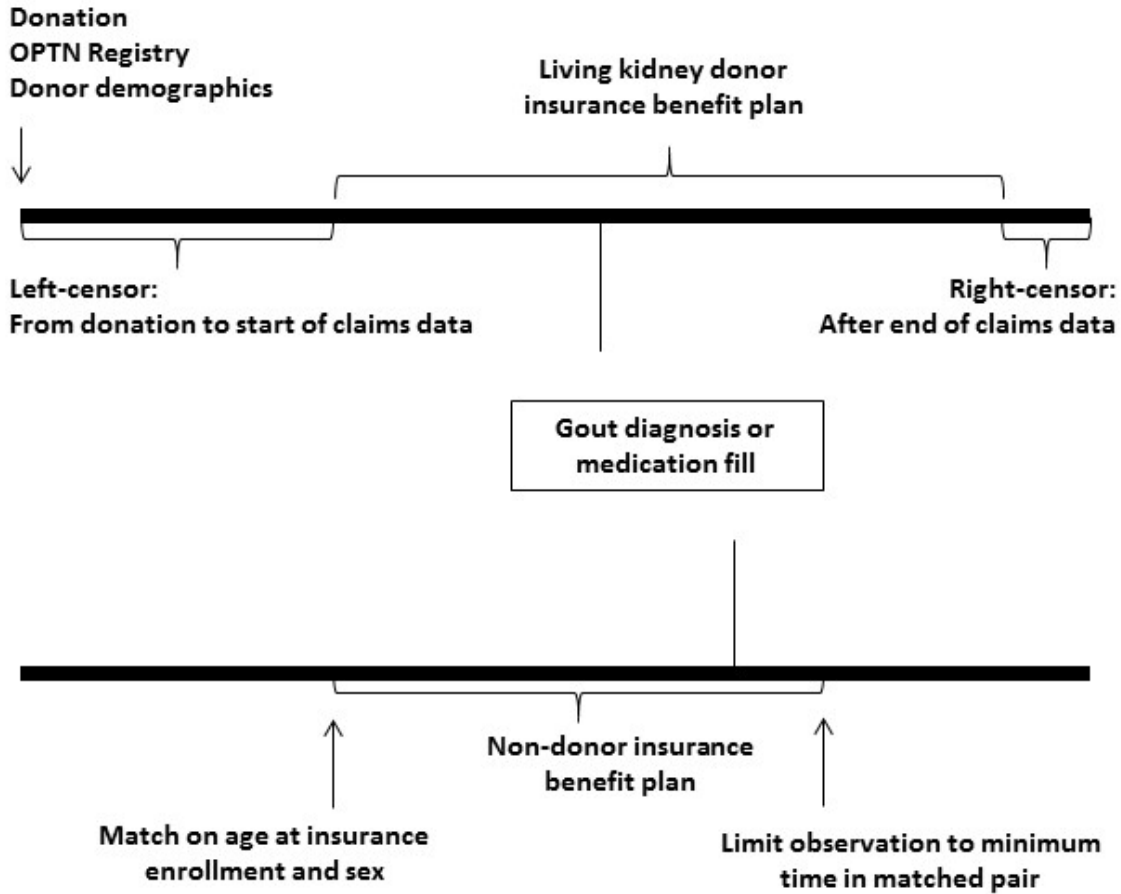

**Supplementary Appendix 3.** Renal diagnosis rates among living kidney donors with gout compared to non-donors with gout, matched 1:3 by age and sex.  $P > 0.05$  for all comparisons.

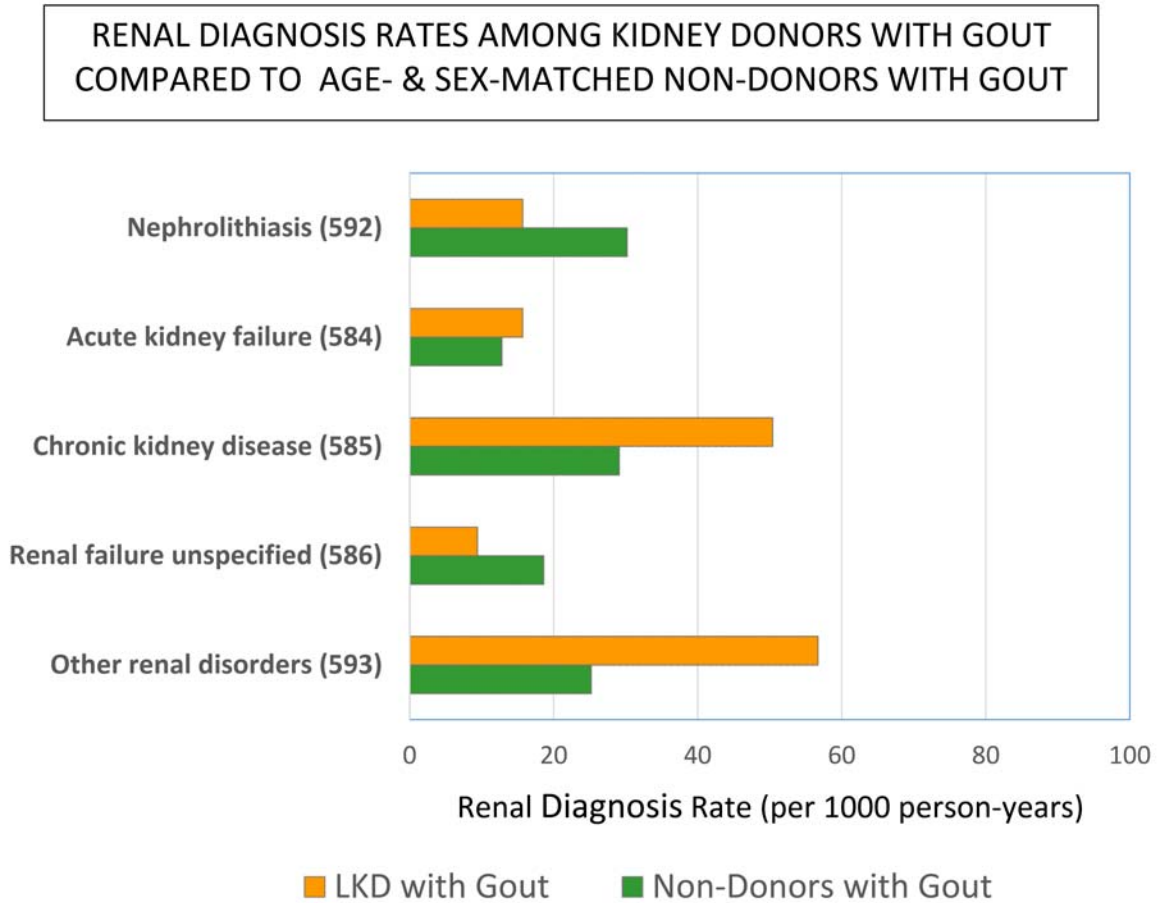

Supplement: NIHMS669763-supplement-supplement_1.pdf [file NIHMS669763-supplement-supplement_1.pdf]
